# Supplementary material
Source: PubMed Central journal article supplement (PMC7098795)

777 **Figure supplement legends**

778 Figure S1. 50% withdrawal threshold to von Frey filament stimulation in the  
779 ipsilesional hind paw was unaffected by thalamic hemorrhage.

780 (A) No significant difference was found in the withdrawal threshold of the ipsilesional  
781 hind paw between the Control and thalamic hemorrhage (TH) groups ( $p > 0.05$ , group  
782 effect by two-way repeated measures ANOVA). (B) There was no significant difference  
783 in the motor function of the ipsilesional hind limb assessed by the ladder walk test ( $p >$   
784  $0.05$ , group effect by two-way repeated measures ANOVA).

785

786 Figure S2. Microglia-related genes were upregulated in the ipsilesional thalamus and S1  
787 but not in the spinal cord on day 4 after thalamic hemorrhage.

788 (A, B) Microglial-related genes were upregulated in the ipsilesional thalamus and in the  
789 ipsilesional S1 in the TH group, compared with the contralesional side in the TH group  
790 or with the ipsilesional side in the Control group (\*\* $p < 0.01$ , \* $p < 0.05$ , one-way  
791 measures ANOVA followed by Tukey's multiple comparisons test). (C) There were no  
792 significant differences in spinal microglia-related genes between the groups ( $p > 0.05$ ,  
793 group effect by one-way repeated measures ANOVA).

794

795 Figure S3. Microglial depletion prevented the development of TH-induced allodynia in

796 female mice.

797 (A) Experimental design. The von Frey test was performed on female mice for three  
798 groups; Control group (n = 6), TH group (n = 8), and TH+PLX group 1 (n = 10) as in  
799 Figure 3. (B) The 50% withdrawal threshold in the TH group was significantly reduced  
800 after hemorrhage compared with the Control group (\*\*p < 0.01, \*p < 0.05, two-way  
801 repeated measures ANOVA followed by Tukey's multiple comparisons test). TH+PLX  
802 group 1, which started PLX treatment before lesion induction, exhibited a higher  
803 withdrawal threshold than the TH group (##p < 0.01, #p < 0.05, two-way repeated  
804 measures ANOVA followed by Tukey's multiple comparisons test).

805

806 Figure S4. Long-term administration of CSF1R inhibitor (PLX3397) eliminated almost  
807 all microglia in the brain but had little effect on macrophages and neutrophils.

808 The quantities of microglia, macrophages and neutrophils in the brain were analyzed by  
809 flow cytometry with expression of CD11b, CD45, Ly6C, Ly6G and CX3CR1. (A) Dot  
810 plots showing CX3CR1<sup>high</sup> positive cells as microglial population in CD11b<sup>+</sup>CD45<sup>low</sup>  
811 Ly6C<sup>low</sup>Ly6G<sup>-</sup> gated cells, CX3CR1<sup>low</sup> positive cells as macrophages in CD11b<sup>+</sup>  
812 CD45<sup>high</sup>Ly6C<sup>high</sup>Ly6G<sup>-</sup> gated cells, and CX3CR1 negative cells as neutrophils in  
813 CD11b<sup>+</sup> CD45<sup>high</sup>Ly6C<sup>high</sup>Ly6G<sup>+</sup> gated cells. (B) The number of immune cells in the

814 brain tended to increase on day 4 after hemorrhage (the left three figures). Comparison  
815 of the cell population between groups on day 4 post hemorrhage (far right figure). The  
816 proportion of neutrophils and macrophages was unaffected among the three groups ( $p >$   
817  $0.05$ , group effect by one-way repeated measures ANOVA). More than 99.5% of  
818 microglia were eliminated ( $*p < 0.01$ , one-way measures ANOVA followed by Tukey's  
819 multiple comparisons test).

820

821 Figure S5. Microglial depletion by the oral administration of PLX3397 exerted no effect  
822 on lesion volume after thalamic hemorrhage.

823 (A) Lesion volume was calculated 4 days after hemorrhage induction. There was no  
824 difference between the thalamic hemorrhage (TH) group and TH+PLX group 1  
825 (corresponding to Figure 3). The PLX treatment was initiated from 21 days before  
826 hemorrhage until day 4 after hemorrhage ( $p > 0.05$ , unpaired t test). (B) No difference  
827 was detected between the TH group and TH+PLX group 1 (PLX treatment was given  
828 from 21 days before hemorrhage until day 7 after hemorrhage) on post-lesion day 7 ( $p >$   
829  $0.05$ , unpaired t test). (C) Lesion volume at 21 days post-hemorrhage. No difference  
830 was detected between the TH group and PLX-treated groups ( $p > 0.05$ , group effect by  
831 one-way measures ANOVA).

Figure S1

A (Ipsilateral limbs)

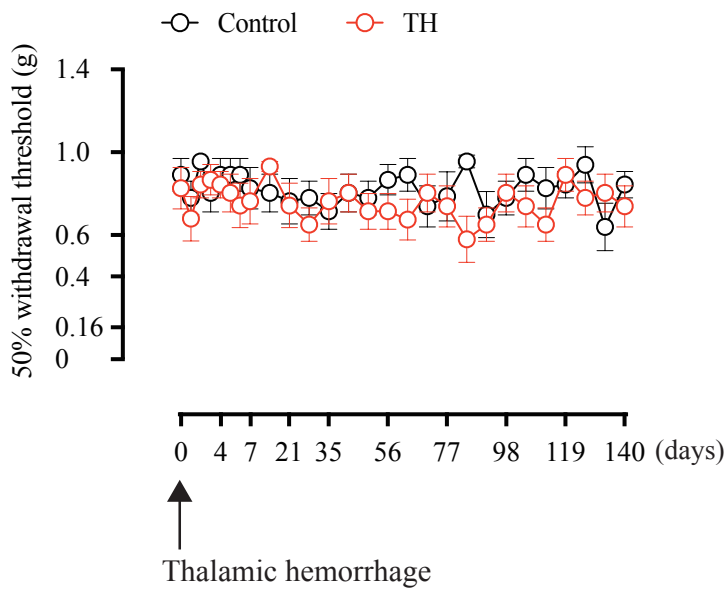

B (Ipsilateral limbs)

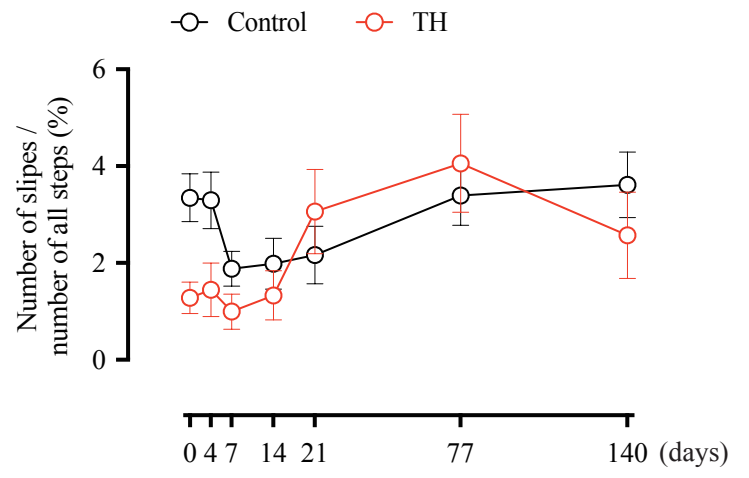

Figure S2

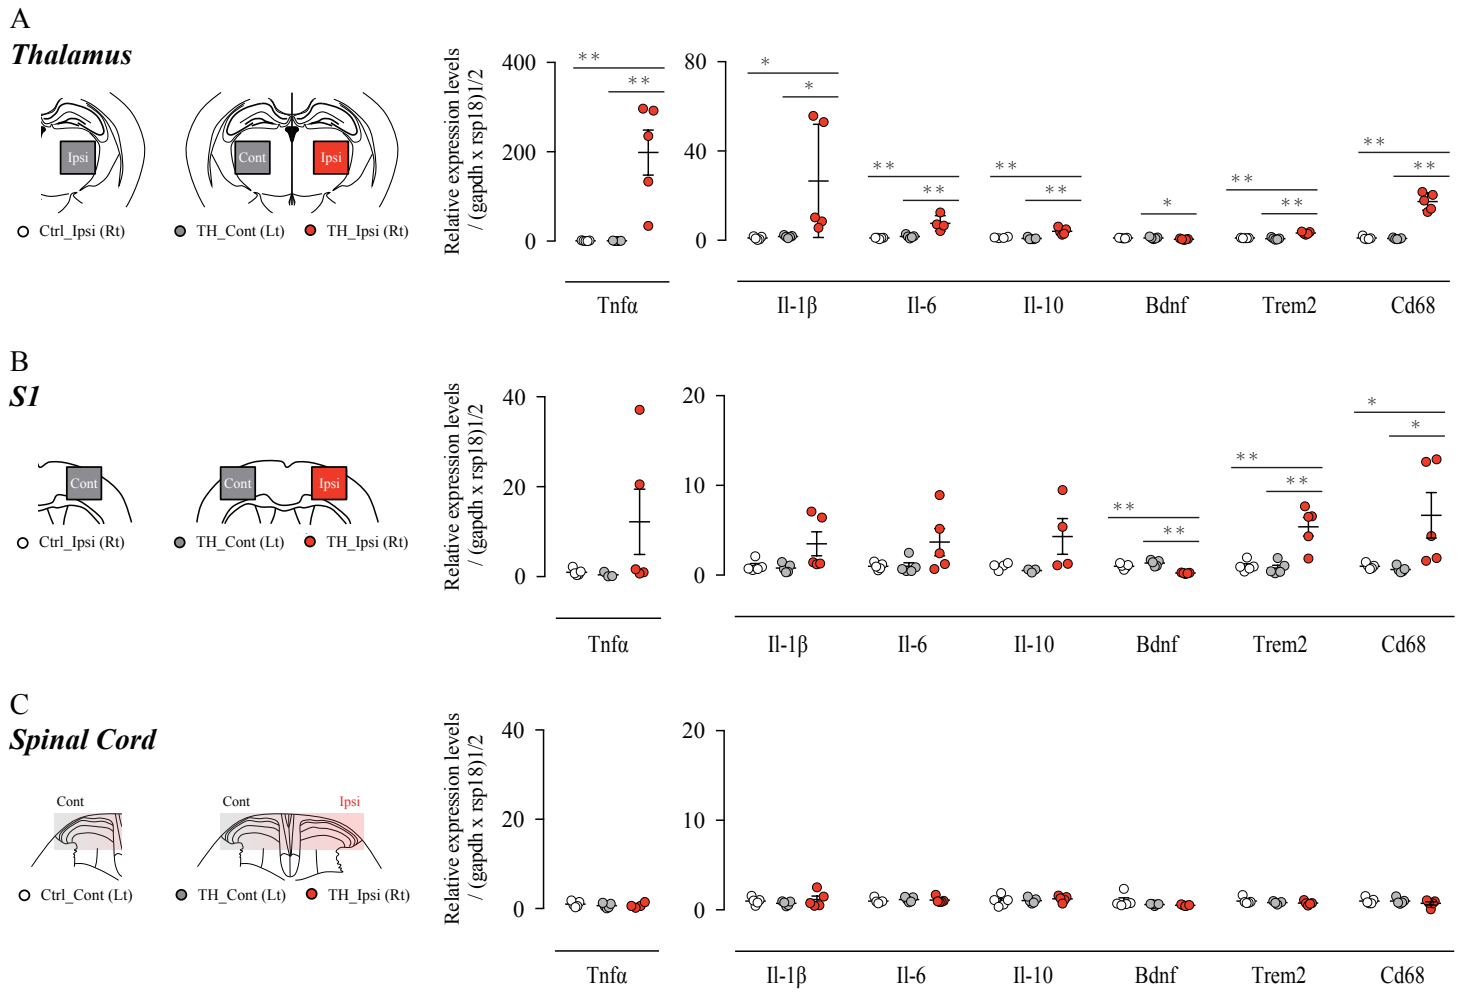

Figure S3

A

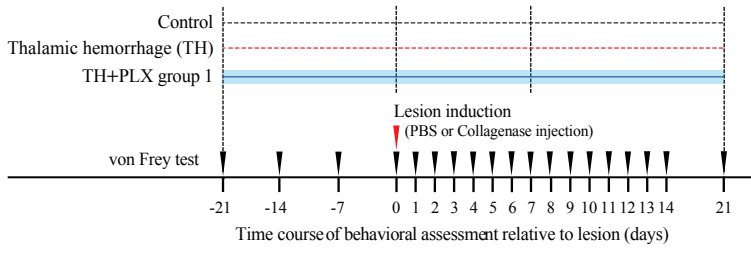

B

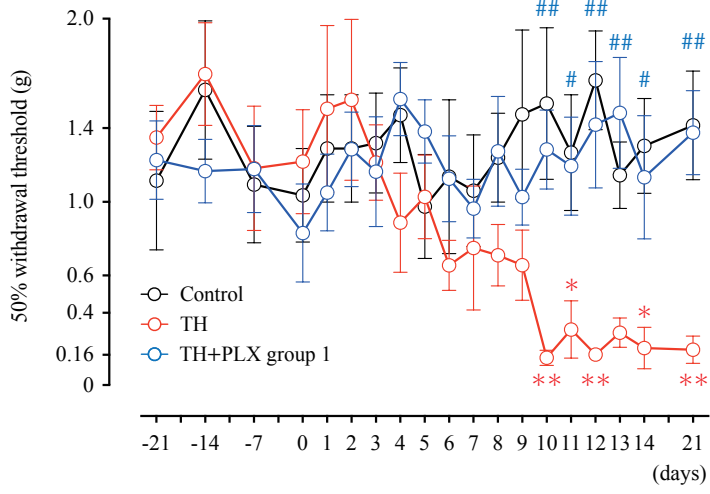

Figure S4

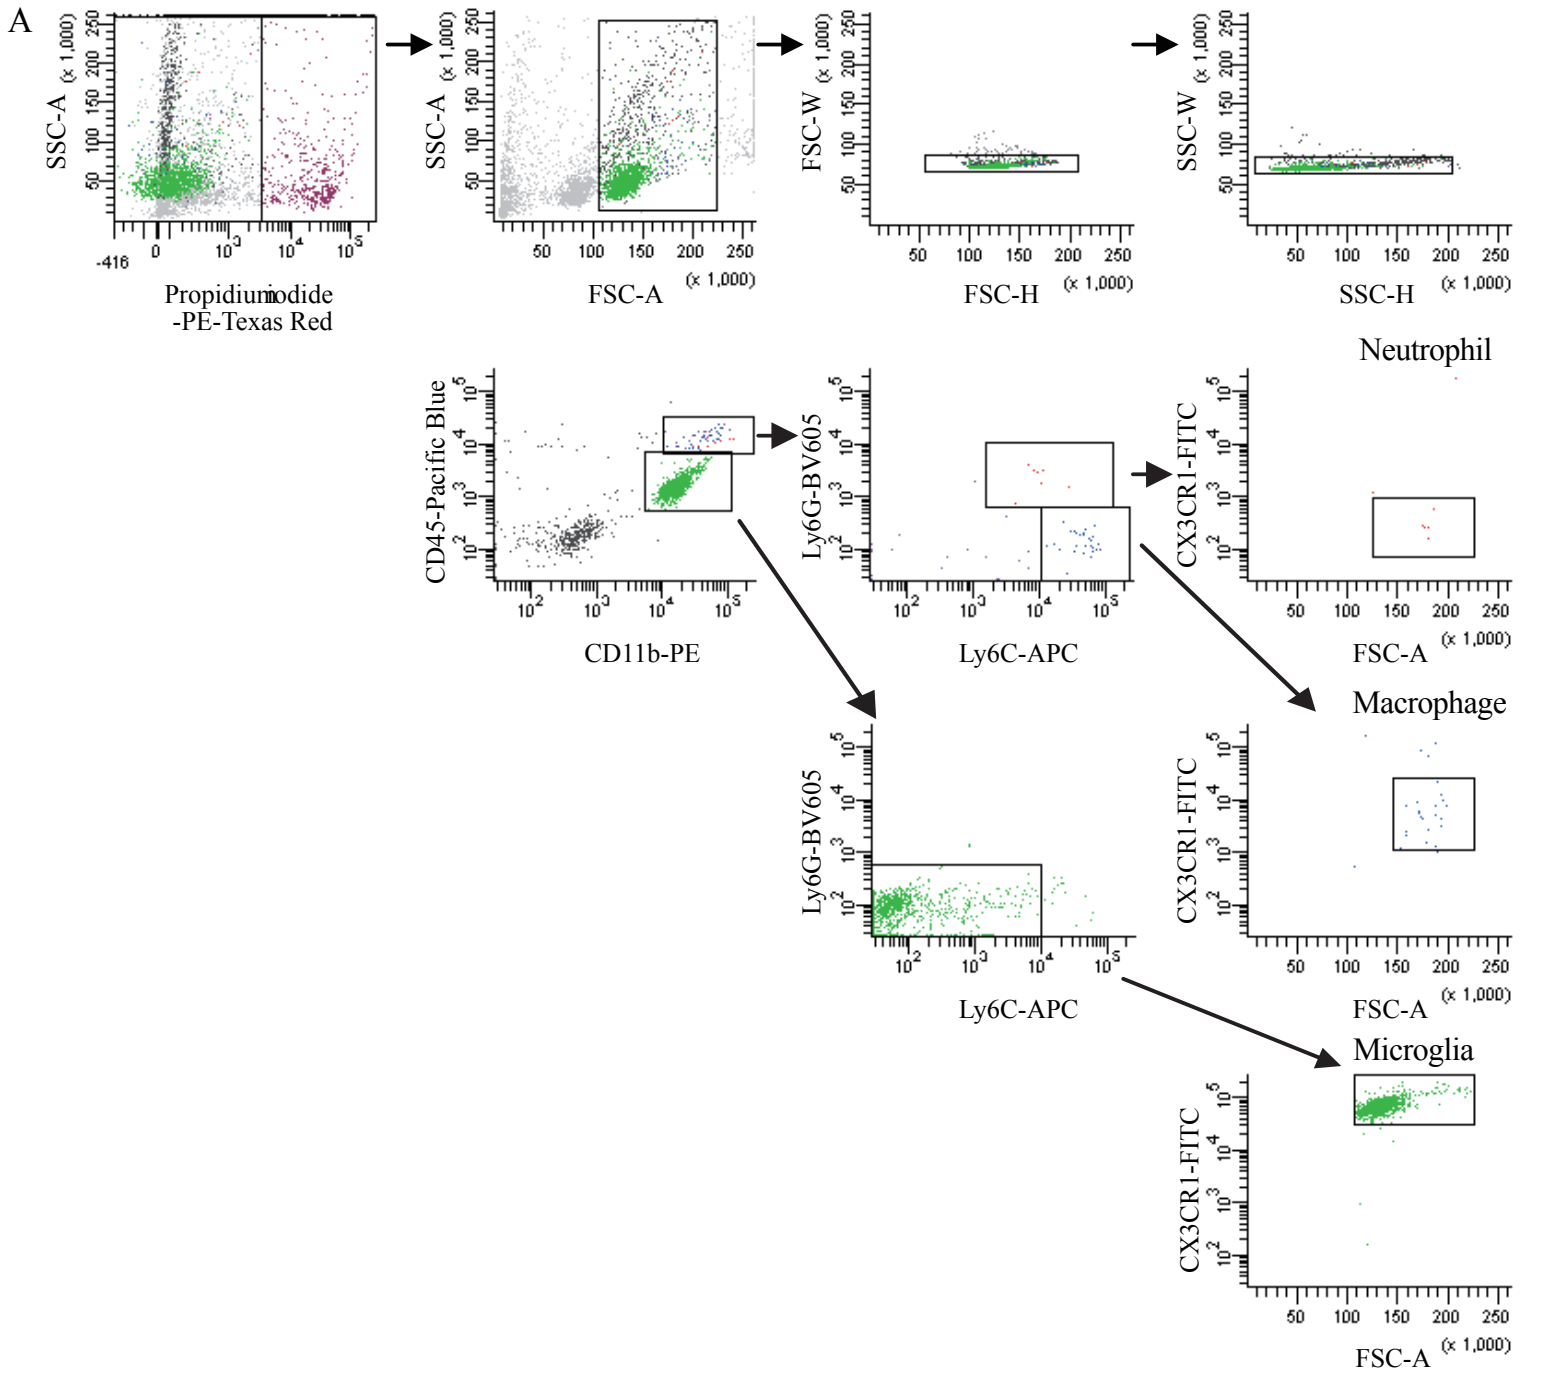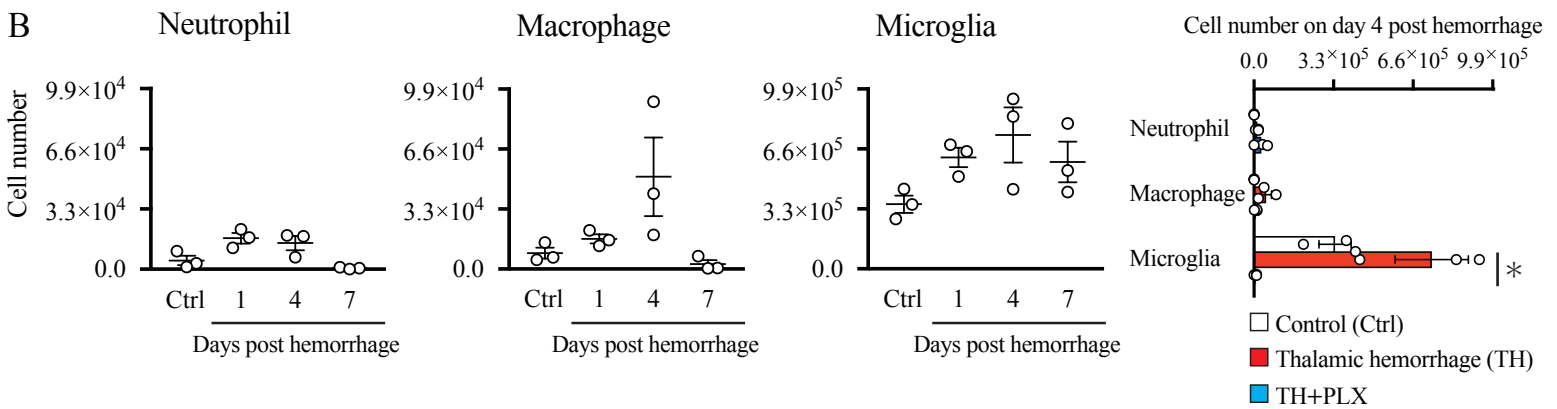

Figure S5

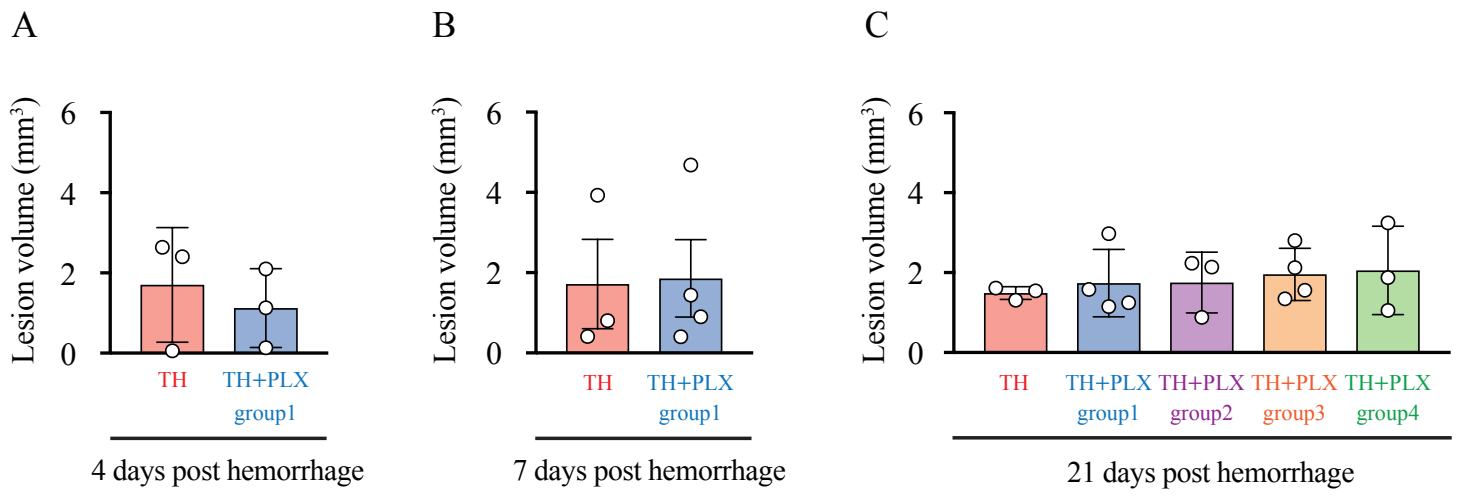

Supplement: jciinsight-5-131801-s180.pdf [file jciinsight-5-131801-s180.pdf]
